# Supplementary material
Source: publisher figshare collection journal article supplement (https://acs.figshare.com/ndownloader/files/4678696)
Supplement: Supplementary file 1 [file 4678696]

data_CRYSTALS_cif 
_audit_creation_date        06-06-14
_audit_creation_method CRYSTALS_ver_12.39

_oxford_structure_analysis_title  'mih13'
_chemical_name_systematic         ?
_chemical_melting_point           ?

_cell_length_a                    9.0036(2)
_cell_length_b                    8.85840(15)
_cell_length_c                    9.5756(2)
_cell_angle_alpha                 90
_cell_angle_beta                  114.931(3)
_cell_angle_gamma                 90
_cell_volume                      692.56(3)
 
_symmetry_cell_setting            'Monoclinic' 
_symmetry_space_group_name_H-M    'P 21/n' 
_symmetry_space_group_name_Hall   '-P 2yn' 
loop_
 _symmetry_equiv_pos_as_xyz
 'x,y,z'
 '-x,-y,-z'
 '-x+1/2,y+1/2,-z+1/2'
 'x+1/2,-y+1/2,z+1/2'

loop_
_atom_type_symbol
_atom_type_scat_dispersion_real
_atom_type_scat_dispersion_imag
_atom_type_scat_Cromer_Mann_a1
_atom_type_scat_Cromer_Mann_b1
_atom_type_scat_Cromer_Mann_a2
_atom_type_scat_Cromer_Mann_b2
_atom_type_scat_Cromer_Mann_a3
_atom_type_scat_Cromer_Mann_b3
_atom_type_scat_Cromer_Mann_a4
_atom_type_scat_Cromer_Mann_b4
_atom_type_scat_Cromer_Mann_c
_atom_type_scat_source  
 C       0.0033   0.0016   2.3100  20.8439   1.0200  10.2075   1.5886   0.5687
   0.8650  51.6512   0.2156 'International Tables Vol C 4.2.6.8 and 6.1.1.4'
 H       0.0000   0.0000   0.4930  10.5109   0.3229  26.1257   0.1402   3.1424
   0.0408  57.7998   0.0030 'International Tables Vol C 4.2.6.8 and 6.1.1.4'
 O       0.0106   0.0060   3.0485  13.2771   2.2868   5.7011   1.5463   0.3239
   0.8670  32.9089   0.2508 'International Tables Vol C 4.2.6.8 and 6.1.1.4'
 N       0.0061   0.0033  12.2126   0.0057   3.1322   9.8933   2.0125  28.9975
   1.1663   0.5826 -11.5290 'International Tables Vol C 4.2.6.8 and 6.1.1.4'
 S       0.1246   0.1234   6.9053   1.4679   5.2034  22.2151   1.4379   0.2536
   1.5863  56.1720   0.8669 'International Tables Vol C 4.2.6.8 and 6.1.1.4'
 Cu      0.3201   1.2651  13.3380   3.5828   7.1676   0.2470   5.6158  11.3966
   1.6735  64.8126   1.1910 'International Tables Vol C 4.2.6.8 and 6.1.1.4'
 
 
_cell_formula_units_Z                    2

# Given Formula = C20 H24 Cu2 N4 O16 S4 
# Dc =      3.96 Fooo =    422.00 Mu =     38.22 M =    415.89
# Found Formula = C10 H12 Cu1 N2 O8 S2 
# Dc =      1.98 FOOO =    422.00 Mu =     19.11 M =    207.95

_chemical_formula_sum             'C10 H12 Cu1 N2 O8 S2'
_chemical_formula_moiety          'C10 H12 Cu1 N2 O8 S2'
_chemical_compound_source                ?
_chemical_formula_weight            415.89
 
 
_cell_measurement_reflns_used         7992
_cell_measurement_theta_min              5
_cell_measurement_theta_max             33
_cell_measurement_temperature           95
 
_exptl_crystal_description        'prismatic' 
_exptl_crystal_colour             'blue' 
_exptl_crystal_size_min           0.15 
_exptl_crystal_size_mid           0.16 
_exptl_crystal_size_max           0.66 
 
_exptl_crystal_density_diffrn     1.994 
_exptl_crystal_density_meas       ? 
# Non-dispersive F(000):          
_exptl_crystal_F_000              422 
_exptl_absorpt_coefficient_mu     1.925 
 
# Sheldrick geometric approximatio 0.73 0.75 
_exptl_absorpt_correction_type    empirical 
_exptl_absorpt_process_details 
; 
AbsPack - CrysAlis RED (Oxford Diffraction, 2002)
; 
_exptl_absorpt_correction_T_min   0.73 
_exptl_absorpt_correction_T_max   0.75 
_diffrn_measurement_device_type   'Oxford Diffraction XCALIBUR' 
_diffrn_radiation_monochromator   'graphite' 
_diffrn_radiation_type            'Mo K\a'
_diffrn_radiation_wavelength           0.71073
_diffrn_measurement_method        \w 
 
_computing_data_collection        'Xcalibur, (Oxford Diffraction, 2002)' 
_computing_data_reduction         'CrysAlis RED, (Oxford Diffraction, 2002)' 
_computing_cell_refinement        'CrysAlis RED, (Oxford Diffraction, 2002)' 
_computing_structure_solution     'SIR2002 (Burla et al., 2003)' 
_computing_structure_refinement   'CRYSTALS (Betteridge et al 2003)' 
_computing_publication_material   'CRYSTALS (Betteridge et al 2003)' 
_computing_molecular_graphics     'CAMERON (Watkin et al 1996)' 
 
_diffrn_standards_number            '4 frames'
_diffrn_standards_interval_time     '30'
_diffrn_standards_decay_%            0.00
 
_diffrn_ambient_temperature         95
_diffrn_reflns_number             10207 
_reflns_number_total              2391 
_diffrn_reflns_av_R_equivalents   0.017 
# Number of reflections with Friedels Law is 2391 
# Number of reflections without Friedels Law is 0 
# Theoretical number of reflections is about 2550 
 
 
_diffrn_reflns_theta_min          4.084 
_diffrn_reflns_theta_max          32.825 
_diffrn_measured_fraction_theta_max 0.928 
 
_diffrn_reflns_theta_full         30.856 
_diffrn_measured_fraction_theta_full 0.997 
 
 
_diffrn_reflns_limit_h_min        -12 
_diffrn_reflns_limit_h_max        13 
_diffrn_reflns_limit_k_min        -12 
_diffrn_reflns_limit_k_max        13 
_diffrn_reflns_limit_l_min        -14 
_diffrn_reflns_limit_l_max        13 
_reflns_limit_h_min               -13 
_reflns_limit_h_max               12 
_reflns_limit_k_min               0 
_reflns_limit_k_max               13 
_reflns_limit_l_min               0 
_reflns_limit_l_max               14 
 
_oxford_diffrn_Wilson_B_factor    0.00 
_oxford_diffrn_Wilson_scale       0.00 
 
_atom_sites_solution_primary      direct #heavy,direct,difmap,geom
# _atom_sites_solution_secondary  difmap
_atom_sites_solution_hydrogens    geom
 
_refine_diff_density_min          -0.40 
_refine_diff_density_max          0.51 
 
 
_refine_ls_number_reflns          2132 
_refine_ls_number_restraints      0 
_refine_ls_number_parameters      124 
 
#_refine_ls_R_factor_ref 0.0201 
_refine_ls_wR_factor_ref          0.0203 
_refine_ls_goodness_of_fit_ref    1.0845 
 
#_reflns_number_all 2391 
_refine_ls_R_factor_all           0.0238 
_refine_ls_wR_factor_all          0.0207 
 
# The I/u(I) cutoff below was used for refinement as 
# well as the _gt R-factors:
_reflns_threshold_expression      I>2.00u(I)
_reflns_number_gt                 2132 
_refine_ls_R_factor_gt            0.0201 
_refine_ls_wR_factor_gt           0.0203 
 
_refine_ls_shift/su_max           0.006444 
 
# choose from: rm (reference molecule of known chirality), 
# ad (anomolous dispersion - Flack), rmad (rm and ad), 
# syn (from synthesis), unk (unknown) or . (not applicable). 
_chemical_absolute_configuration  '.' 
 
 
_refine_ls_structure_factor_coef  F 
_refine_ls_matrix_type            full
_refine_ls_hydrogen_treatment     refxyz         # none, undef, noref, refall,
                                                 # refxyz, refU, constr or mixed
_refine_ls_weighting_scheme       calc 
_refine_ls_weighting_details 
;
 Method, part 1, Chebychev polynomial, (Watkin, 1994, Prince, 1982) 
 [weight] = 1.0/[A~0~*T~0~(x)+A~1~*T~1~(x) ... +A~n-1~]*T~n-1~(x)] 
 where A~i~ are the Chebychev coefficients listed below and x= Fcalc/Fmax 
 Method = Robust Weighting (Prince, 1982) 
 W = [weight] * [1-(deltaF/6*sigmaF)^2^]^2^ 
 A~i~ are: 
 11.6 -6.63 7.06 2.26 
;
 
 
_refine_special_details
;
All atoms were refined anisotropically. Positional coordinated of the hydrogen
 atoms were refined independently
; 
 
_publ_contact_author_name         'M. Barboiu'
_publ_contact_author_address        #
;
IEM-UMII, cc047, 34095 Montpellier Cedex 5, France
;

_publ_contact_author_email           'barboiu@iemm.univ-montp2.fr'

_publ_requested_journal              'Chemistry, a European Journal'

loop_
_publ_author_name
'Y.-M. Legrand'
'A. van der Lee'
'N. Masquelez'
'M. Barboiu'
'P. Rabu'

_publ_section_references 
; 
Betteridge, P.W., Carruthers, J.R., Cooper, R.I., 
Prout, K., Watkin, D.J. (2003). J. Appl. Cryst. 36, 1487. 

M. C. Burla, M. B. Camalli, G. L. Carrozzini, R. Cascarano, C.
Giacovazzo, G. Polidori and R. Spagna, J. Appl. Crystallogr.,
2003, 36, 1103.
 

 
Oxford Diffraction, (2002) CrysAlis RED. 
 
Oxford Diffraction, (2002) Xcalibur User Manual 
 
Prince, E. 
Mathematical Techniques in Crystallography 
and Materials Science 
Springer-Verlag, New York, 1982. 
 
Watkin D.J. (1994), 
Acta Cryst, A50, 411-437 
 
Watkin, D.J., Prout, C.K. & Pearce, L.J. (1996) CAMERON, Chemical 
Crystallography Laboratory, OXFORD, UK. 
; 

# Uequiv = arithmetic mean of Ui i.e. Ueqiv = (U1+U2+U3)/3

# Replace last . with number of unfound hydrogen atoms attached to an atom.

# ..._refinement_flags_... 
# . no refinement constraints           S special position constraint on site
# G rigid group refinement of site      R riding atom
# D distance or angle restraint on site T thermal displacement constraints
# U Uiso or Uij restraint (rigid bond)  P partial occupancy constraint


loop_
_atom_site_label
_atom_site_type_symbol
_atom_site_fract_x
_atom_site_fract_y
_atom_site_fract_z
_atom_site_U_iso_or_equiv
_atom_site_occupancy
_atom_site_adp_type
_atom_site_refinement_flags_posn
_atom_site_refinement_flags_adp
_atom_site_refinement_flags_occupancy
_atom_site_disorder_assembly
_atom_site_disorder_group
_atom_site_attached_hydrogens
Cu1 Cu 0.0000 0.5000 0.5000 0.0100 1.0000 Uani S . . . . . 
N2 N 0.08942(8) 0.53494(8) 0.72642(8) 0.0106 1.0000 Uani . . . . . . 
C3 C 0.20213(9) 0.44389(9) 0.82919(9) 0.0102 1.0000 Uani . . . . . . 
C4 C 0.25721(9) 0.46744(9) 0.98581(9) 0.0095 1.0000 Uani . . . . . . 
C5 C 0.19430(10) 0.58619(10) 1.03900(9) 0.0114 1.0000 Uani . . . . . . 
C6 C 0.07917(10) 0.68006(10) 0.93246(9) 0.0126 1.0000 Uani . . . . . . 
C7 C 0.03008(10) 0.65141(9) 0.77726(9) 0.0123 1.0000 Uani . . . . . . 
S8 S 0.40399(2) 0.34667(2) 1.12091(2) 0.0103 1.0000 Uani . . . . . . 
O9 O 0.49109(8) 0.27368(7) 1.04139(8) 0.0131 1.0000 Uani . . . . . . 
O10 O 0.30959(8) 0.23968(8) 1.16720(8) 0.0153 1.0000 Uani . . . . . . 
O11 O 0.50433(8) 0.44556(9) 1.24572(8) 0.0186 1.0000 Uani . . . . . . 
O12 O 0.22244(8) 0.49278(8) 0.50423(8) 0.0136 1.0000 Uani . . . . . . 
H13 H 0.240(3) 0.370(3) 0.787(3) 0.0500 1.0000 Uiso . . . . . . 
H14 H 0.224(3) 0.600(3) 1.141(3) 0.0500 1.0000 Uiso . . . . . . 
H15 H 0.037(3) 0.764(3) 0.964(3) 0.0500 1.0000 Uiso . . . . . . 
H16 H -0.042(3) 0.714(3) 0.701(3) 0.0500 1.0000 Uiso . . . . . . 
H17 H 0.299(3) 0.511(3) 0.586(3) 0.0500 1.0000 Uiso . . . . . . 
H18 H 0.231(3) 0.554(3) 0.444(3) 0.0500 1.0000 Uiso . . . . . . 
loop_
_atom_site_aniso_label
_atom_site_aniso_U_11
_atom_site_aniso_U_22
_atom_site_aniso_U_33
_atom_site_aniso_U_23
_atom_site_aniso_U_13
_atom_site_aniso_U_12
Cu1 0.00741(6) 0.01410(7) 0.00536(6) -0.00016(4) -0.00029(5) 0.00161(4) 
N2 0.0088(3) 0.0129(3) 0.0071(3) -0.0002(2) 0.0003(2) 0.0009(2) 
C3 0.0089(3) 0.0122(3) 0.0075(3) -0.0001(2) 0.0014(2) 0.0011(2) 
C4 0.0077(3) 0.0116(3) 0.0075(3) -0.0001(2) 0.0016(2) -0.0011(2) 
C5 0.0106(3) 0.0143(3) 0.0085(3) -0.0023(2) 0.0033(2) -0.0015(3) 
C6 0.0116(3) 0.0135(3) 0.0122(3) -0.0020(3) 0.0044(3) 0.0006(3) 
C7 0.0103(3) 0.0136(3) 0.0107(3) 0.0000(3) 0.0022(3) 0.0014(2) 
S8 0.00850(8) 0.01374(9) 0.00636(8) 0.00106(6) 0.00079(6) 0.00036(6) 
O9 0.0112(2) 0.0155(3) 0.0124(2) 0.0018(2) 0.0048(2) 0.0020(2) 
O10 0.0169(3) 0.0174(3) 0.0137(3) 0.0044(2) 0.0084(2) 0.0010(2) 
O11 0.0140(3) 0.0229(3) 0.0103(3) -0.0038(2) -0.0034(2) -0.0006(2) 
O12 0.0092(2) 0.0181(3) 0.0099(3) -0.0008(2) 0.0005(2) 0.0012(2) 

_refine_ls_extinction_method 
    'None'
_oxford_refine_ls_scale 8.400(9) 
loop_
 _geom_bond_atom_site_label_1
 _geom_bond_site_symmetry_1
 _geom_bond_atom_site_label_2
 _geom_bond_site_symmetry_2
 _geom_bond_distance
 _geom_bond_publ_flag
Cu1 . O9 3_556 2.4633(7)    yes
Cu1 . O9 4_454 2.4633(7)    yes
Cu1 . N2 2_566 1.9932(7)    yes
Cu1 . O12 2_566 1.9870(6)    yes
Cu1 . N2 . 1.9932(7)    yes
Cu1 . O12 . 1.9870(6)    yes
N2 . C3 . 1.3442(10)    yes
N2 . C7 . 1.3440(11)    yes
C3 . C4 . 1.3827(11)    yes
C3 . H13 . 0.91(2)    no
C4 . C5 . 1.3892(11)    yes
C4 . S8 . 1.7673(8)    yes
C5 . C6 . 1.3839(11)    yes
C5 . H14 . 0.90(2)    no
C6 . C7 . 1.3837(11)    yes
C6 . H15 . 0.94(2)    no
C7 . H16 . 0.93(2)    no
S8 . O9 . 1.4547(7)    yes
S8 . O10 . 1.4611(7)    yes
S8 . O11 . 1.4497(7)    yes
O12 . H17 . 0.81(3)    no
O12 . H18 . 0.82(3)    no
loop_
 _geom_angle_atom_site_label_1
 _geom_angle_site_symmetry_1
 _geom_angle_atom_site_label_2
 _geom_angle_site_symmetry_2
 _geom_angle_atom_site_label_3
 _geom_angle_site_symmetry_3
 _geom_angle
 _geom_angle_publ_flag
O9 3_556 Cu1 . O9 4_454 179.995    yes
O9 3_556 Cu1 . N2 2_566 90.20(3)    yes
O9 4_454 Cu1 . N2 2_566 89.80(3)    yes
O9 3_556 Cu1 . O12 2_566 93.78(2)    yes
O9 4_454 Cu1 . O12 2_566 86.22(2)    yes
N2 2_566 Cu1 . O12 2_566 92.37(3)    yes
O9 3_556 Cu1 . N2 . 89.80(3)    yes
O9 4_454 Cu1 . N2 . 90.20(3)    yes
N2 2_566 Cu1 . N2 . 179.994    yes
O12 2_566 Cu1 . N2 . 87.63(3)    yes
O9 3_556 Cu1 . O12 . 86.22(2)    yes
O9 4_454 Cu1 . O12 . 93.78(2)    yes
N2 2_566 Cu1 . O12 . 87.63(3)    yes
O12 2_566 Cu1 . O12 . 179.994    yes
N2 . Cu1 . O12 . 92.37(3)    yes
Cu1 . N2 . C3 . 122.50(6)    yes
Cu1 . N2 . C7 . 118.24(5)    yes
C3 . N2 . C7 . 119.22(7)    yes
N2 . C3 . C4 . 121.23(7)    yes
N2 . C3 . H13 . 114.5(15)    no
C4 . C3 . H13 . 124.2(15)    no
C3 . C4 . C5 . 119.78(7)    yes
C3 . C4 . S8 . 121.22(6)    yes
C5 . C4 . S8 . 118.99(6)    yes
C4 . C5 . C6 . 118.63(7)    yes
C4 . C5 . H14 . 121.0(15)    no
C6 . C5 . H14 . 120.3(15)    no
C5 . C6 . C7 . 118.84(8)    yes
C5 . C6 . H15 . 121.1(15)    no
C7 . C6 . H15 . 120.0(15)    no
C6 . C7 . N2 . 122.28(8)    yes
C6 . C7 . H16 . 122.2(14)    no
N2 . C7 . H16 . 115.4(14)    no
C4 . S8 . O9 . 106.72(4)    yes
C4 . S8 . O10 . 105.29(4)    yes
O9 . S8 . O10 . 112.41(4)    yes
C4 . S8 . O11 . 104.57(4)    yes
O9 . S8 . O11 . 114.46(4)    yes
O10 . S8 . O11 . 112.45(4)    yes
Cu1 3_546 O9 . S8 . 125.66(4)    yes
Cu1 . O12 . H17 . 116.6(19)    no
Cu1 . O12 . H18 . 111.1(17)    no
H17 . O12 . H18 . 105(2)    no
